# Supplementary material
Source: Springer Nature journal article supplement (https://www.springermedizin.de/resource/supplementary/12936_2012_2502_MOESM5_ESM.pdf/9543128)

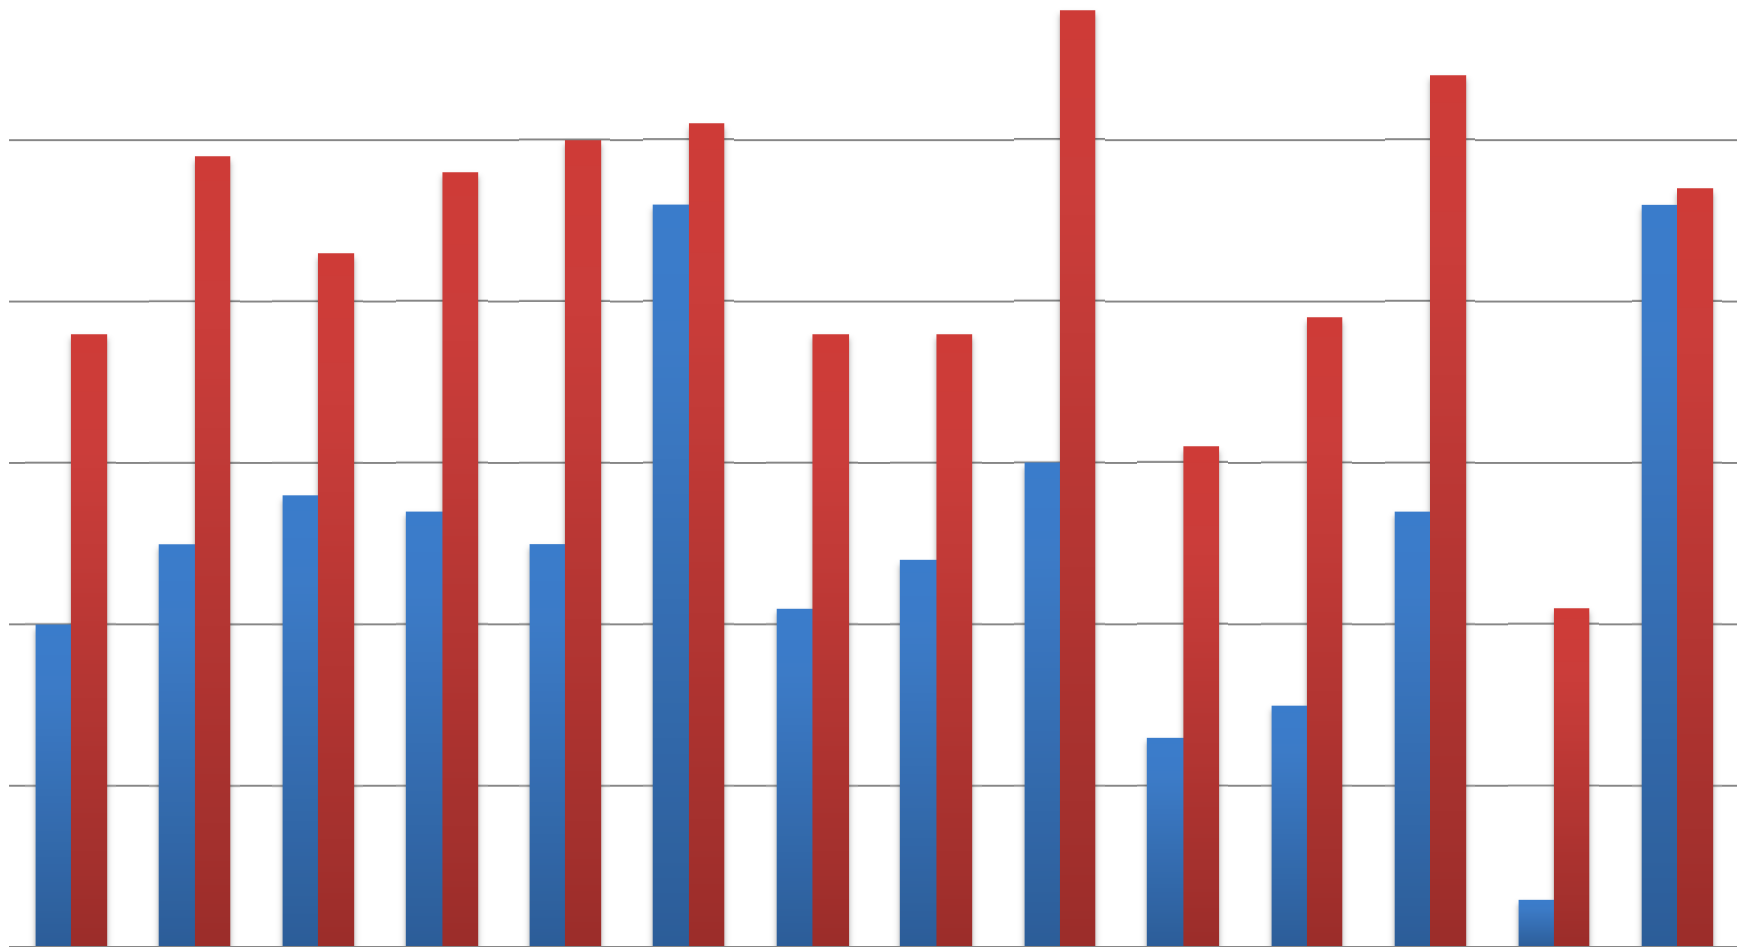

|      | 1  | 2  | 3  | 4  | 5  | 6  | 7  | 8  | 9  | 10 | 11 | 12 | 13 | 14 |
|------|----|----|----|----|----|----|----|----|----|----|----|----|----|----|
| pre  | 20 | 25 | 28 | 27 | 25 | 46 | 21 | 24 | 30 | 13 | 15 | 27 | 3  | 46 |
| post | 38 | 49 | 43 | 48 | 50 | 51 | 38 | 38 | 58 | 31 | 39 | 54 | 21 | 47 |

Supplement: MOESM5 [file 9543128]
